# Supplementary material for: Usnic Acid Derivatives Inhibit DNA Repair Enzymes Tyrosyl-DNA Phosphodiesterases 1 and 2 and Act as Potential Anticancer Agents
Source: MDPI journal article supplement (doi:10.3390/genes14101931), 2023-10-12
Supplement: s1 [file s1]

# Supplementary

## Usnic acid derivatives inhibit DNA repair enzymes Tyrosyl-DNA phosphodiesterases 1 and 2 and act as potential anticancer agents

Alexandra L. Zakharenko <sup>1</sup>, Nadezhda S. Dyrkheeva <sup>1</sup>, Olga A. Luzina <sup>2</sup>, Aleksandr S. Filimonov <sup>2</sup>, Evgenii S. Mozhaitsev <sup>2</sup>, Anastasia A. Malakhova <sup>3</sup>, Sergey P. Medvedev <sup>3</sup>, Suren M. Zakian <sup>3</sup>, Nariman F. Salakhutdinov <sup>2</sup>, and Olga I. Lavrik <sup>1,\*</sup>

<sup>1</sup> Institute of Chemical Biology and Fundamental Medicine, Siberian Branch of the Russian Academy of Sciences, 8, Akademika Lavrentieva Ave., 630090 Novosibirsk, Russia; a.zakharenko73@gmail.com (A.L.Z.); dyrkheeva.n.s@gmail.com (N.S.D.); lavrik@niboch.nsc.ru (O.I.L.)

<sup>2</sup> N. N. Vorozhtsov Novosibirsk Institute of Organic Chemistry, Siberian Branch of the Russian Academy of Sciences, 9, Akademika Lavrentieva Ave., 630090 Novosibirsk, Russia; luzina@nioch.nsc.ru (O.A.L.); alfil@nioch.nsc.ru (A.S.F.); mozh@nioch.nsc.ru (E.S.M.); anvar@nioch.nsc.ru (N.F.S.)

<sup>3</sup> Federal Research Center Institute of Cytology and Genetics, Siberian Branch of the Russian Academy of Sciences, 10, Akademika Lavrentieva Ave., 630090 Novosibirsk, Russia; amal@bionet.nsc.ru (A.A.M.); medvedev@bionet.nsc.ru (S.P.M.); zakian@bionet.nsc.ru (S.M.Z.)

\* Correspondence: lavrik@niboch.nsc.ru; Tel.: + 7-383-3635195

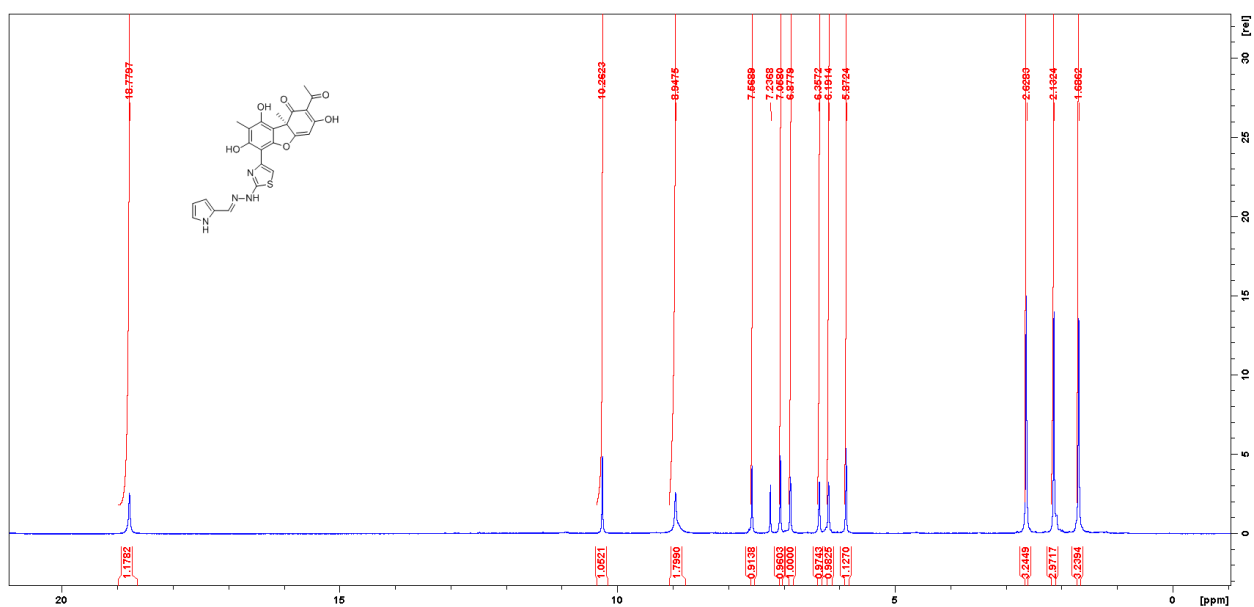

Figure S1. The  $^1\text{H}$  spectrum of compound 11a.

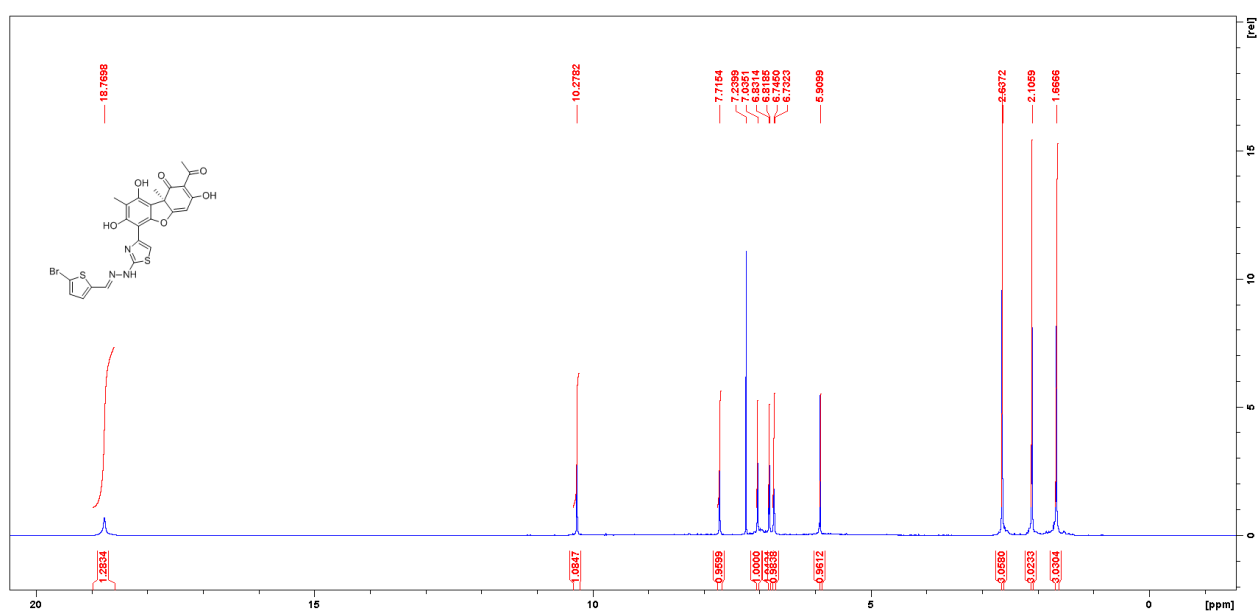

Figure S2. The  $^1\text{H}$  spectrum of compound 11b.

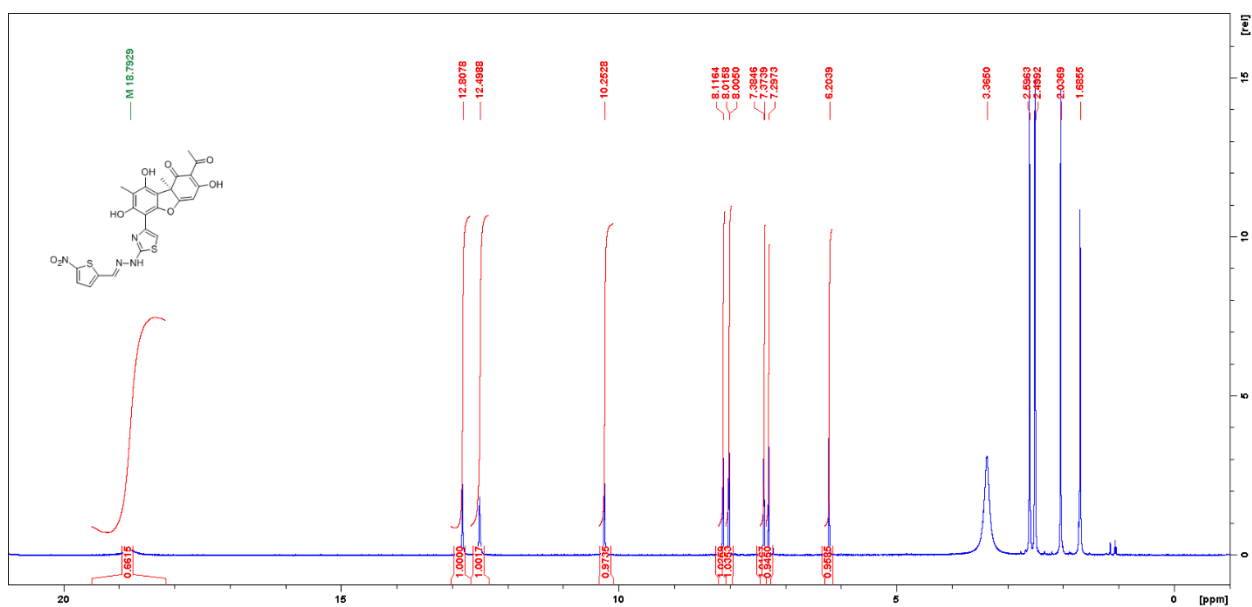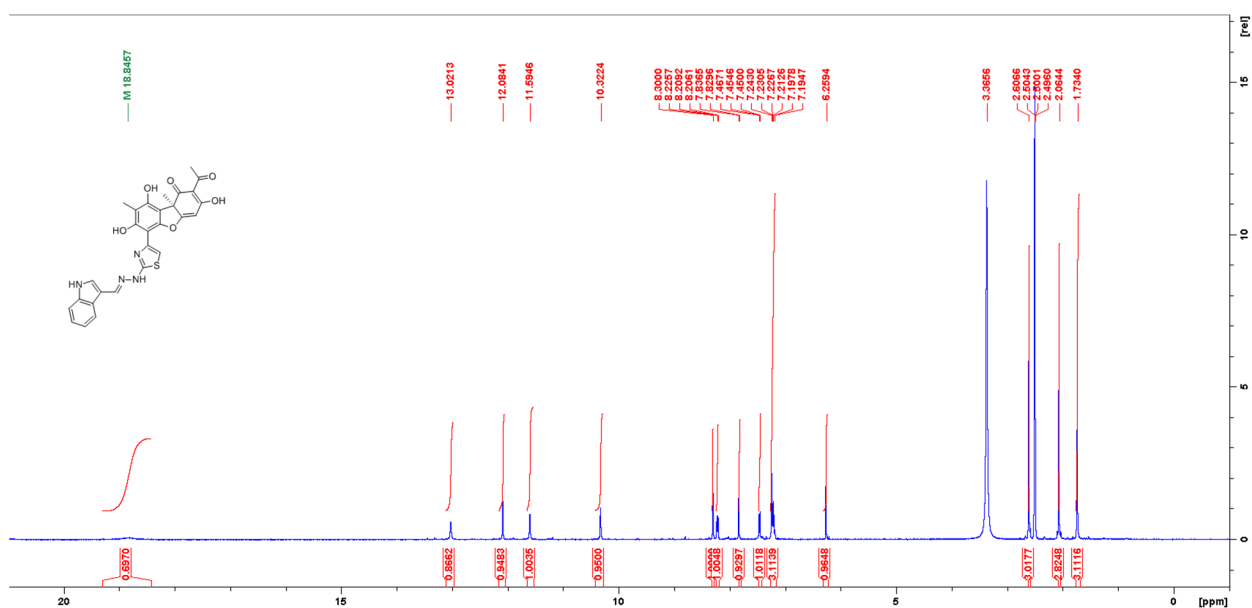

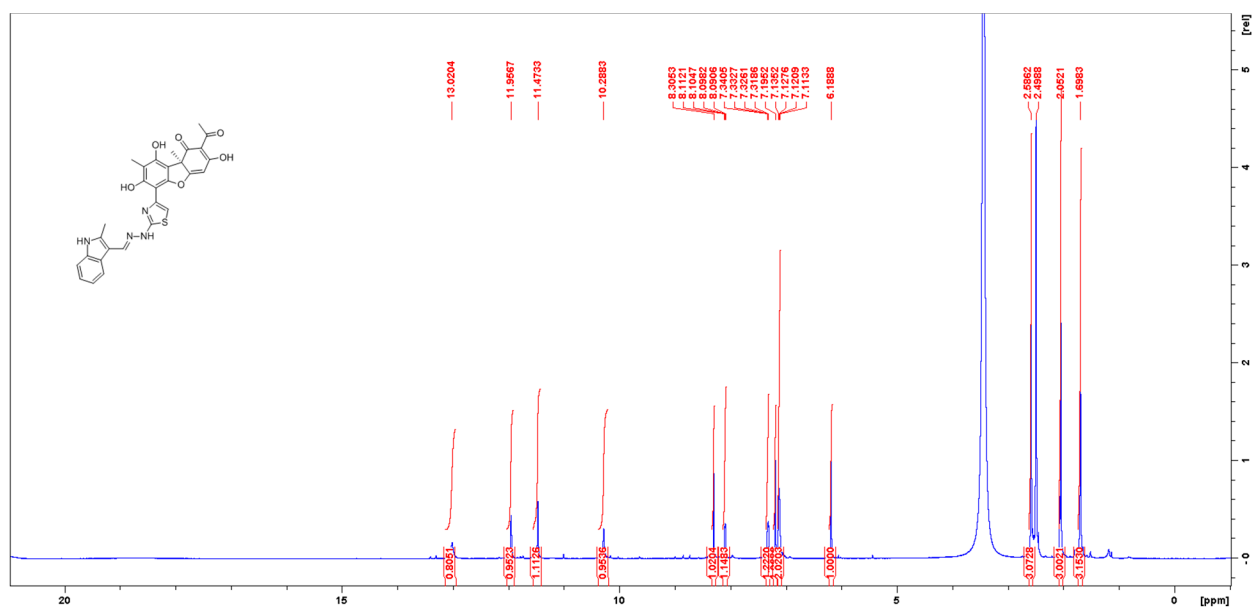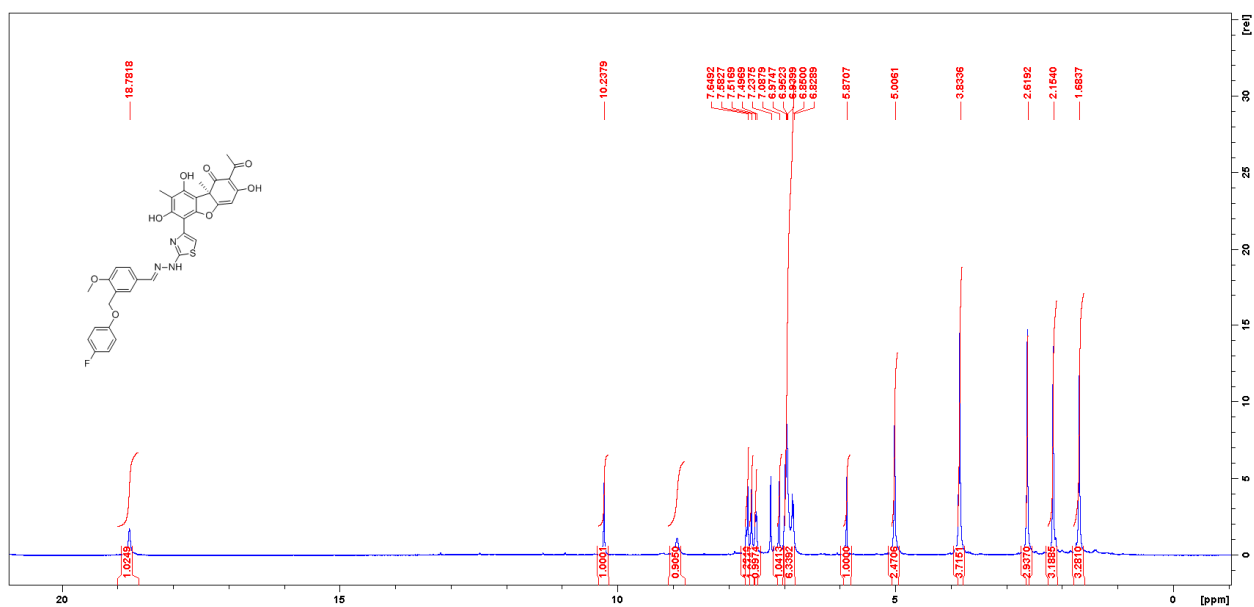

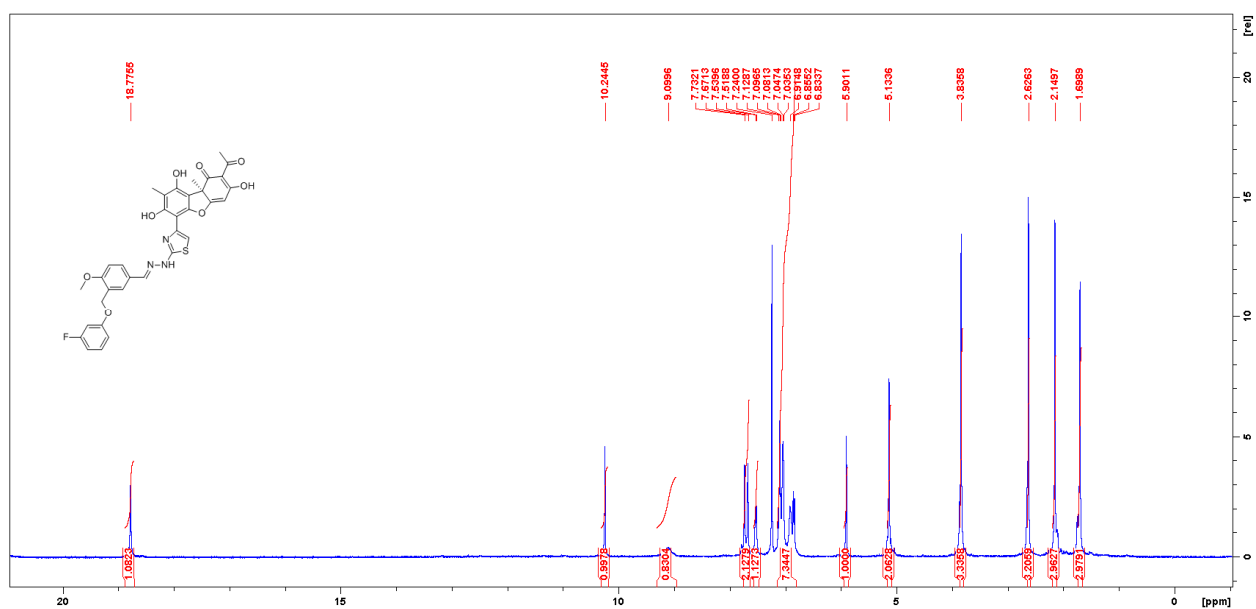

Figure S7. The <sup>1</sup>H spectrum of compound 11g.

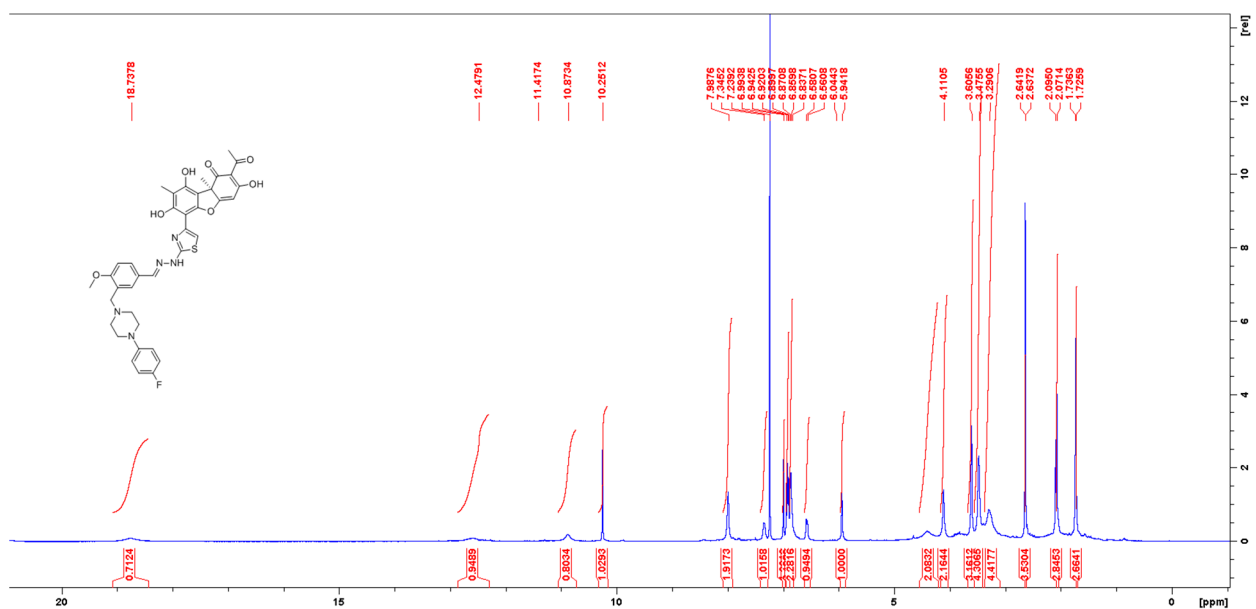

Figure S8. The <sup>1</sup>H spectrum of compound 11h.

A

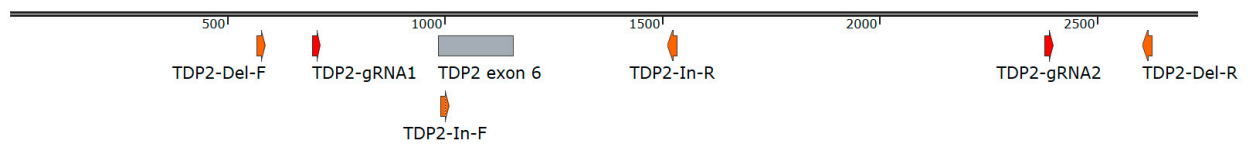

B

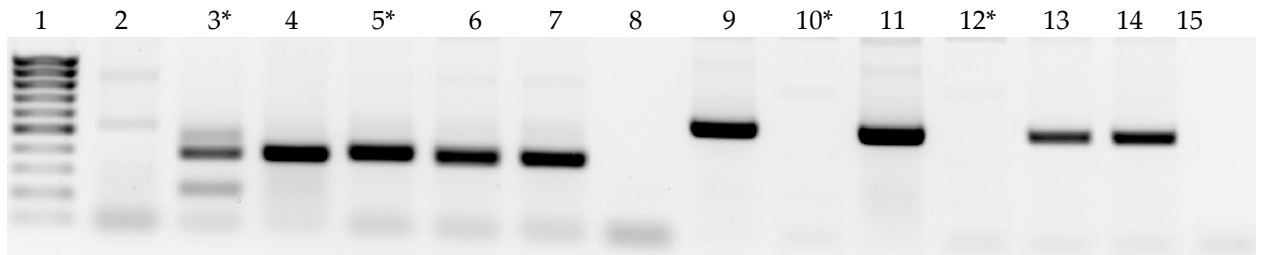

**Figure S9.** Scheme of protospacers (TDP2-gRNA1 and TDP2-gRNA1) and primers location in *TDP2* gene (A) and PCR analysis of CRISPR/Cas9-induced deletion (B): lanes: 1) DNA ladder Step100 (Biolabmix, Novosibirsk, Russia; 2-7) PCR analysis of HEK293FT clones genomic DNA with primers for detecting a deletions (TDP2-Del-F and TDP2-Del-R); 8) H<sub>2</sub>O with primers TDP2-Del-F and TDP2-Del-R; 9-14) PCR analysis of HEK293FT clones genomic DNA with primers for the detection of the wild-type alleles (TDP2-In-F and TDP2-In-R); 15) H<sub>2</sub>O with primers TDP2-In-F and TDP2-In-R; \* - these two cell clones were selected for further analysis.

**Table S1.** Molecular docking results

| ID ligand      | Docking score | Emodel   | IFD score | Interactions           |                                                                                                                         |
|----------------|---------------|----------|-----------|------------------------|-------------------------------------------------------------------------------------------------------------------------|
|                |               |          |           | $\pi$ - $\pi$ Stacking | Other interactions                                                                                                      |
| <b>(-)-11a</b> | -8.463        | -93.324  | -469.56   | Trp307, Tyr321         | Arg276 $\pi$ -cation<br>Ser236, Arg276, Asn274 - H-bond<br>Ley134, Trp307, Ley315, Tyr321 - hydrophobic                 |
| <b>(-)-11b</b> | -7.112        | -94.008  | -469.67   | Phe325                 | Asn274 - H-bond<br>Ley315, Tyr321 - hydrophobic                                                                         |
| <b>(-)-11c</b> | -8.033        | -108.527 | -469.14   | Trp307                 | Arg276 $\pi$ -cation<br>Arg276 - H-bond<br>Trp307, Tyr321 - hydrophobic                                                 |
| <b>(-)-11d</b> | -8.613        | -113.831 | -468.70   | Trp307, Tyr321, His323 | Arg241, Arg276 $\pi$ -cation<br>Asn274, Arg276, Asp277, Lys322 - H-bond<br>Ley134, Trp307, Ley315, Tyr321 - hydrophobic |
| <b>(-)-11e</b> | -7.524        | -98.671  | -467.97   | Trp307, Tyr321, His323 | Arg241, Arg276 $\pi$ -cation<br>Arg276, Asn274 - H-bond<br>Trp307, Ley315 - hydrophobic                                 |
| <b>(-)-11g</b> | -7.335        | -104.451 | -468.41   | Trp307, Tyr321         | Arg276 $\pi$ -cation<br>Ley315 - hydrophobic                                                                            |
| <b>(-)-11h</b> | -8.649        | -120.321 | -468.01   | Trp307, Phe325         | Arg241 $\pi$ -cation<br>Asn274, Arg276 - H-bond<br>Ley134, Trp307, Ley315 - hydrophobic                                 |
